# Supplementary material for: Systematic structural control of multichromic platinum(ii)-diimine complexes ranging from ionic solid to coordination polymer
Source: Royal Society of Chemistry journal article supplement (doi:10.1039/c1dt11155h), 2011-12-15
Supplement: c1dt11155h.pdf [file c1dt11155h.pdf]

## Systematic Structural Control of Multichromic Platinum(II)-Diimine Complexes Ranging from Ionic Solid to Coordination Polymer

Atsushi Kobayashi,\* Hirofumi Hara, Tsubasa Yonemura, Ho-Chol Chang and Masako Kato\*

Division of Chemistry, Faculty of Science, Hokkaido University, North-10 West-8, Kita-ku, Sapporo  
060-0810, Japan

### Supporting Information

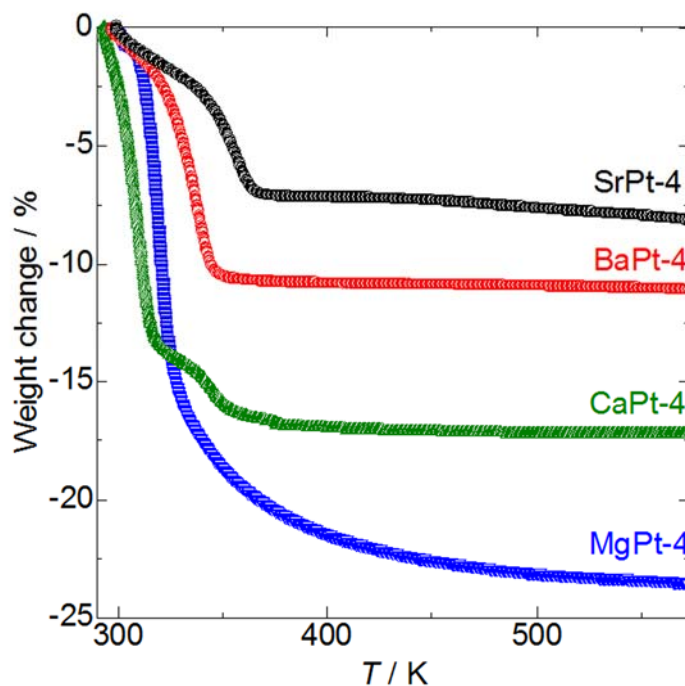

**Figure S1.** TG curves of **MgPt-4·9H<sub>2</sub>O**, **CaPt-4·6H<sub>2</sub>O**, **SrPt-4·3H<sub>2</sub>O** and **BaPt-4·5H<sub>2</sub>O**. (1 K/min heating, Ar flow rate: 300 ml/min)

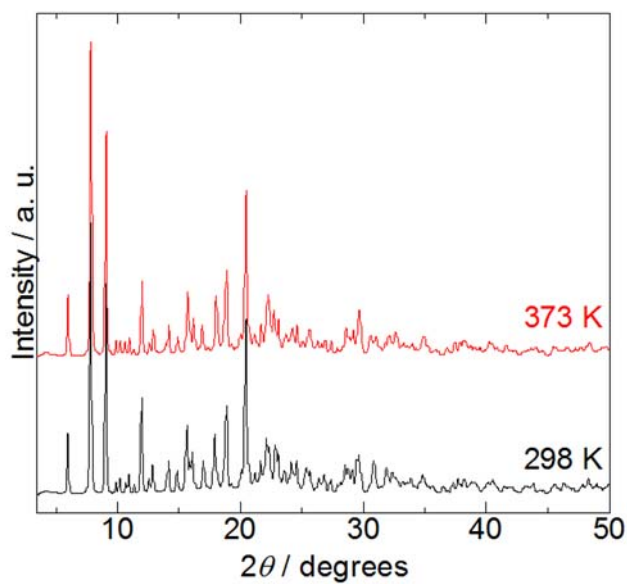

**Figure S2.** PXRD patterns of **BaPt-4.5H<sub>2</sub>O** at 298 (black) and 373 K (red).  $\lambda = 1.200(1)$  Å.

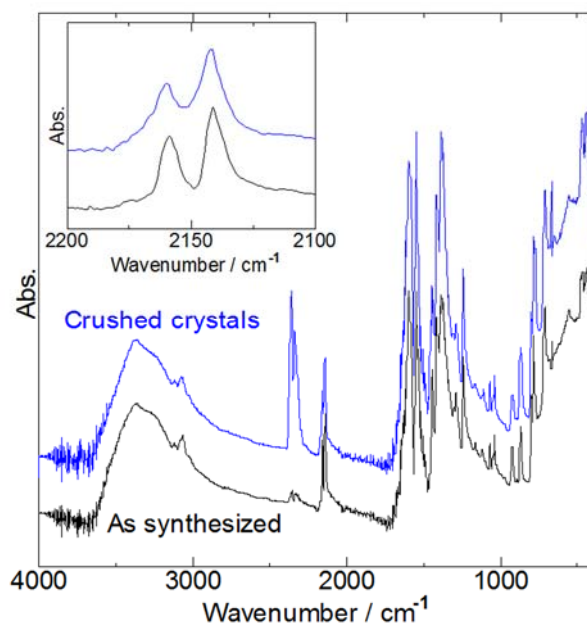

**Figure S3.** IR spectra of as synthesized **CaPt-4.6H<sub>2</sub>O** (black) and the crushed crystals (blue). Inset shows the expansion of the  $\nu(\text{C}\equiv\text{N})$  vibration band region around 2150 cm<sup>-1</sup>.

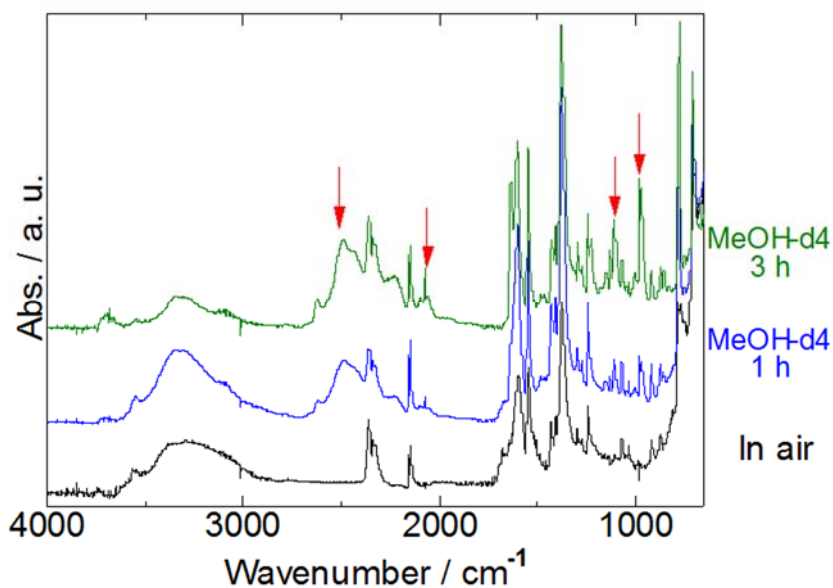

**Figure S4.** IR spectral change of as-synthesized **MgPt-4.9H<sub>2</sub>O** (black) under exposure to methanol-d<sub>4</sub> vapour at room temperature. Red arrows indicate the band assigned to the adsorbed methanol-d<sub>4</sub>.

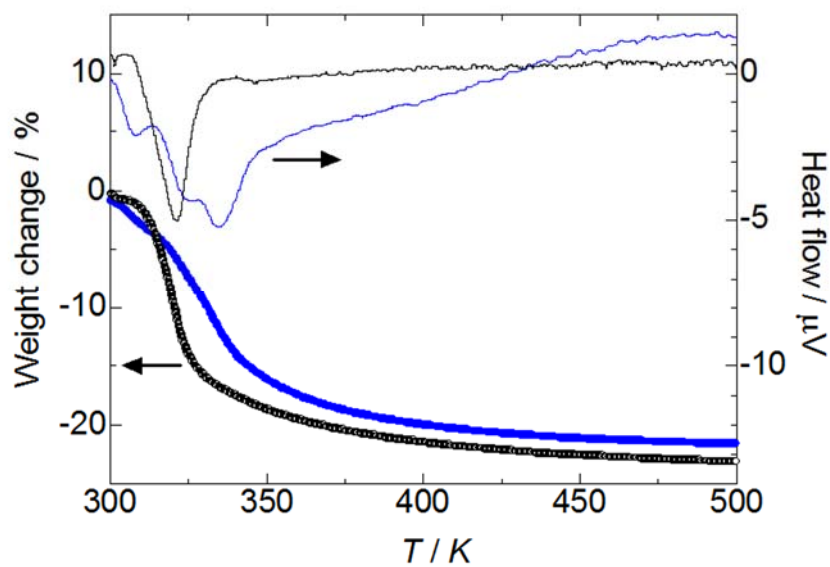

**Figure S5.** TG-DTA analyses of **MgPt-4.9H<sub>2</sub>O** (black) before and (blue) after exposing it to MeOH vapour at room temperature for 1 day.

**Table S1.** Selected bond lengths of the metalloligand [Pt(CN)<sub>2</sub>(4,4'-dcbpy)]<sup>2-</sup>.

|                       | <b>Na<sub>2</sub>Pt-4·<br/>5H<sub>2</sub>O<sup>a</sup></b> | <b>MgPt-4·<br/>9H<sub>2</sub>O</b> | <b>CaPt-4·<br/>6H<sub>2</sub>O</b> | <b>SrPt-4·<br/>3H<sub>2</sub>O</b> | <b>BaPt-4·<br/>5H<sub>2</sub>O</b> |
|-----------------------|------------------------------------------------------------|------------------------------------|------------------------------------|------------------------------------|------------------------------------|
| Pt1-N1                | 2.047(4)                                                   | 2.043(6)                           | <b>2.042(4)</b>                    | 2.011(12)                          | 2.053(6)                           |
| Pt1-N2                | 2.047(4)                                                   | 2.058(9)                           | <b>2.050(4)</b>                    | 2.042(15)                          | 2.034(5)                           |
| Pt1-C13               | 1.944(5)                                                   | 1.960(11)                          | <b>1.946(5)</b>                    | 1.97(2)                            | 1.944(7)                           |
| Pt1-C14               | 1.955(4)                                                   | 1.961(8)                           | <b>1.948(5)</b>                    | 1.966(16)                          | 1.953(8)                           |
| M-O1<br>(carboxylate) | -                                                          | 2.084(7)                           | <b>2.355(3)</b><br><b>2.618(3)</b> | 2.555(12)<br>2.765(11)             | 2.748(5)<br>2.873(5)               |
| M-O2<br>(carboxylate) | -                                                          | -                                  | <b>2.489(4)</b>                    | 2.615(11)<br>2.707(11)             | 2.743(5)<br>2.876(5)               |
| M-O3<br>(carboxylate) | -                                                          | -                                  | <b>2.537(3)</b>                    | 2.734(12)                          | 2.906(5)                           |
| M-O4<br>(carboxylate) | 2.344(4)                                                   | -                                  | <b>2.505(3)</b>                    | 2.652(14)                          | 2.813(5)                           |
| M-O5 (water)          | 2.396(3)<br>2.392(4)                                       | 2.057(7)                           | <b>2.387(3)</b>                    | 2.615(14)                          | 2.780(5)                           |
| M-O6 (water)          | 2.551(5)<br>2.370(4)                                       | 2.089(8)                           | <b>2.417(3)</b>                    | 2.632(14)                          | 2.819(5)                           |
| M-O7 (water)          | 2.404(4)                                                   | 2.074(9)                           | <b>2.409(4)</b>                    | -                                  | -                                  |
| M-O8 (water)          | 2.435(3)<br>2.394(4)                                       | 2.075(8)                           | -                                  | -                                  | -                                  |
| M-O9 (water)          | 2.419(3)<br>2.492(4)                                       | 2.076(11)                          | -                                  | -                                  | -                                  |
| M-N3(cyano)           | 2.553(4)                                                   | -                                  | -                                  | -                                  | -                                  |
| M-N4(cyano)           | 2.618(4)                                                   | -                                  | -                                  | 2.675(14)                          | 2.918(6)                           |
| N1-C1                 | 1.348(6)                                                   | 1.336(15)                          | <b>1.338(7)</b>                    | 1.41(2)                            | 1.341(9)                           |
| N1-C5                 | 1.377(6)                                                   | 1.368(13)                          | <b>1.350(6)</b>                    | 1.37(2)                            | 1.349(9)                           |
| N2-C6                 | 1.363(6)                                                   | 1.351(10)                          | <b>1.365(6)</b>                    | 1.37(2)                            | 1.381(10)                          |
| N2-C10                | 1.357(6)                                                   | 1.344(14)                          | <b>1.335(7)</b>                    | 1.33(2)                            | 1.331(9)                           |
| N3-C13                | 1.146(7)                                                   | 1.124(16)                          | <b>1.141(6)</b>                    | 1.11(2)                            | 1.150(10)                          |
| N4-C14                | 1.151(6)                                                   | 1.137(12)                          | <b>1.140(7)</b>                    | 1.14(2)                            | 1.147(11)                          |
| O1-C11                | 1.246(6)                                                   | 1.262(11)                          | <b>1.243(6)</b>                    | 1.21(2)                            | 1.258(9)                           |

|        |          |           |          |           |           |
|--------|----------|-----------|----------|-----------|-----------|
| O2-C11 | 1.272(6) | 1.243(12) | 1.263(6) | 1.224(19) | 1.262(9)  |
| O3-C12 | 1.255(5) | 1.241(10) | 1.251(6) | 1.23(2)   | 1.256(10) |
| O4-C12 | 1.241(5) | 1.308(13) | 1.253(6) | 1.25(2)   | 1.258(10) |
| C1-C2  | 1.378(7) | 1.371(12) | 1.367(8) | 1.38(2)   | 1.372(11) |
| C2-C3  | 1.390(6) | 1.389(15) | 1.389(7) | 1.39(2)   | 1.391(10) |
| C3-C4  | 1.390(6) | 1.391(15) | 1.410(7) | 1.36(2)   | 1.403(10) |
| C3-C11 | 1.508(7) | 1.525(11) | 1.499(7) | 1.55(2)   | 1.489(11) |
| C4-C5  | 1.370(7) | 1.380(11) | 1.380(7) | 1.41(2)   | 1.388(11) |
| C5-C6  | 1.478(6) | 1.475(15) | 1.477(7) | 1.42(2)   | 1.478(10) |
| C6-C7  | 1.398(6) | 1.404(15) | 1.376(6) | 1.38(2)   | 1.389(10) |
| C7-C8  | 1.375(6) | 1.388(15) | 1.382(7) | 1.39(2)   | 1.391(10) |
| C8-C9  | 1.385(6) | 1.384(12) | 1.385(7) | 1.37(2)   | 1.386(11) |
| C8-C12 | 1.536(6) | 1.508(17) | 1.526(7) | 1.57(2)   | 1.516(11) |
| C9-C10 | 1.384(6) | 1.385(17) | 1.363(7) | 1.37(2)   | 1.378(10) |

<sup>a</sup> Ref. 1

### **Elemental analyses of as synthesized and crushed MgPt-4·9H<sub>2</sub>O**

Calcd. for [Mg(H<sub>2</sub>O)<sub>5</sub>][Pt(CN)<sub>2</sub>(4,4'-dcbpy)]·4H<sub>2</sub>O : C 24.88, H 3.58, N 8.29.

Found for as synthesized crystals : C 24.41, H 3.39, N 8.35.

Found for the crushed sample: C 24.43, H 3.22, N 8.32.

### **Elemental analysis of the sample obtained from exposure MgPt-4·9H<sub>2</sub>O to MeOH vapour**

Calcd. for {Mg[Pt(CN)<sub>2</sub>(4,4'-dcbpy)]·6H<sub>2</sub>O·MeOH} : C 27.56, H 3.39, N 8.57.

Found : C 27.31, H 2.99, N 8.39.

### **Reference**

1) A. Kobayashi, T. Yonemura, M. Kato, *Eur. J. Inorg. Chem.* 2010, 2465-2470.
